# Supplementary material for: Effects of Exercise Intervention on Peripheral Skeletal Muscle in Stable Patients With COPD: A Systematic Review and Meta-Analysis
Source: PubMed Central journal article supplement (PMC8636927; doi:10.3389/fmed.2021.766841), 2021-11-18
Supplement: Data_Sheet_1.pdf [file Data_Sheet_1.pdf]

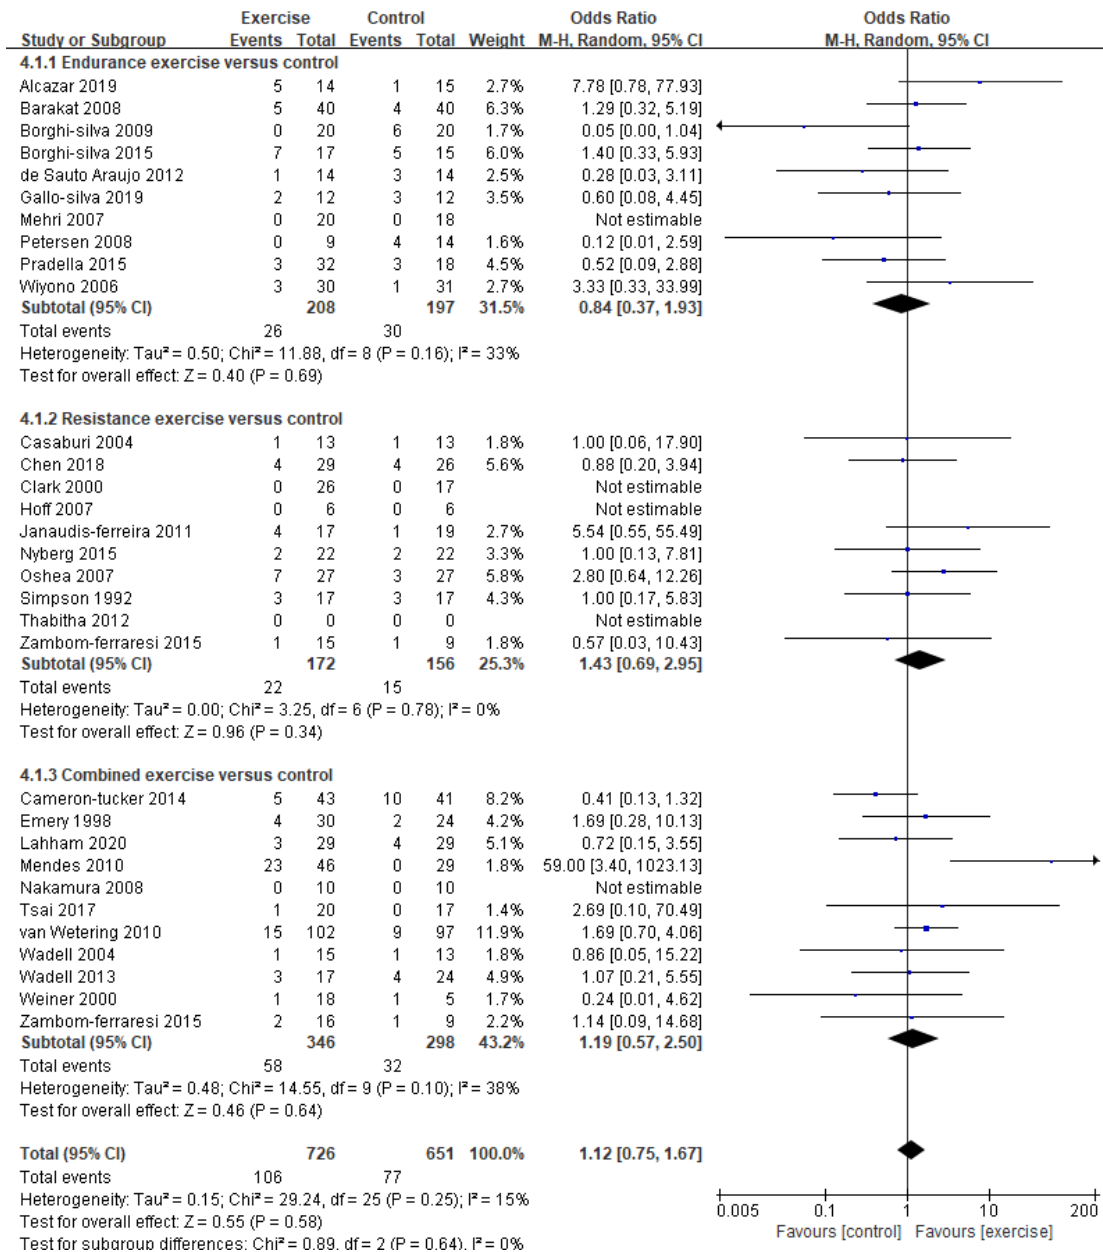

**Figure S1** Pooled effect of exercise compared with control on attrition number.

CI, confidence interval; OR, odds ratio; SD, standard deviation.

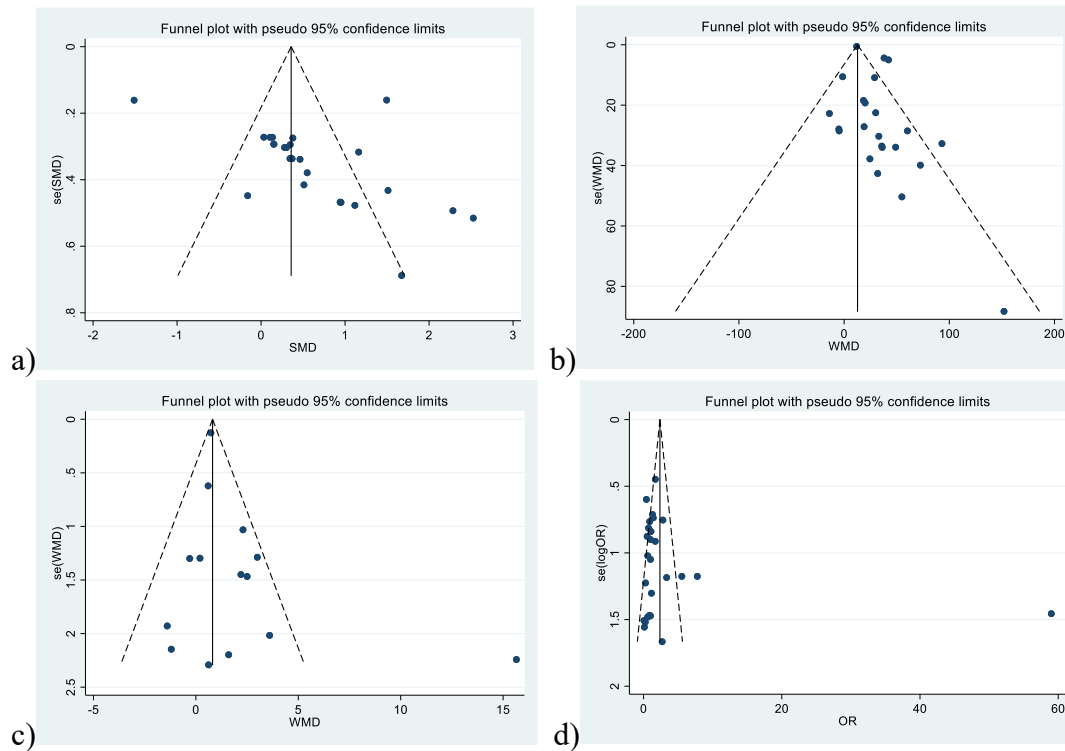

**Figure S2** Funnel plot showing SE and effect size in trials of exercise for a) skeletal muscle strength, b) 6MWD, c)  $VO_2$  peak, d) attrition number in COPD patients. 6MWD, 6-min walking distance; COPD, chronic obstructive pulmonary disease; OR, odds ratio; SMD, standardized mean difference;  $VO_2$  peak, peak oxygen consumption; WMD, weighted mean difference.

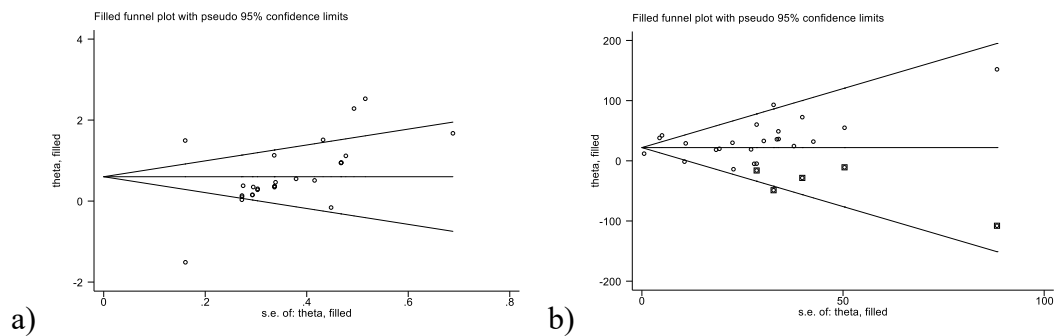

**Figure S3** Trim and fill methods showing the filled studies need to diminish the publication bias (the circles enclosed in boxes are filled studies). a) skeletal muscle strength, b) 6MWD. 6MWT, 6-min walking distance.
